# Supplementary material for: Does international trade improve environmental efficiency? An application of a super slacks-based measure of efficiency
Source: Springer Nature journal article supplement (doi:10.1186/s40008-015-0023-6), 2015-08-19
Supplement: MOESM1 [file 11901252]

Additional file 1.

Figure S1. The environmental efficiency indices of 98 countries for SO<sub>2</sub> and CO<sub>2</sub>

(1970-2008)

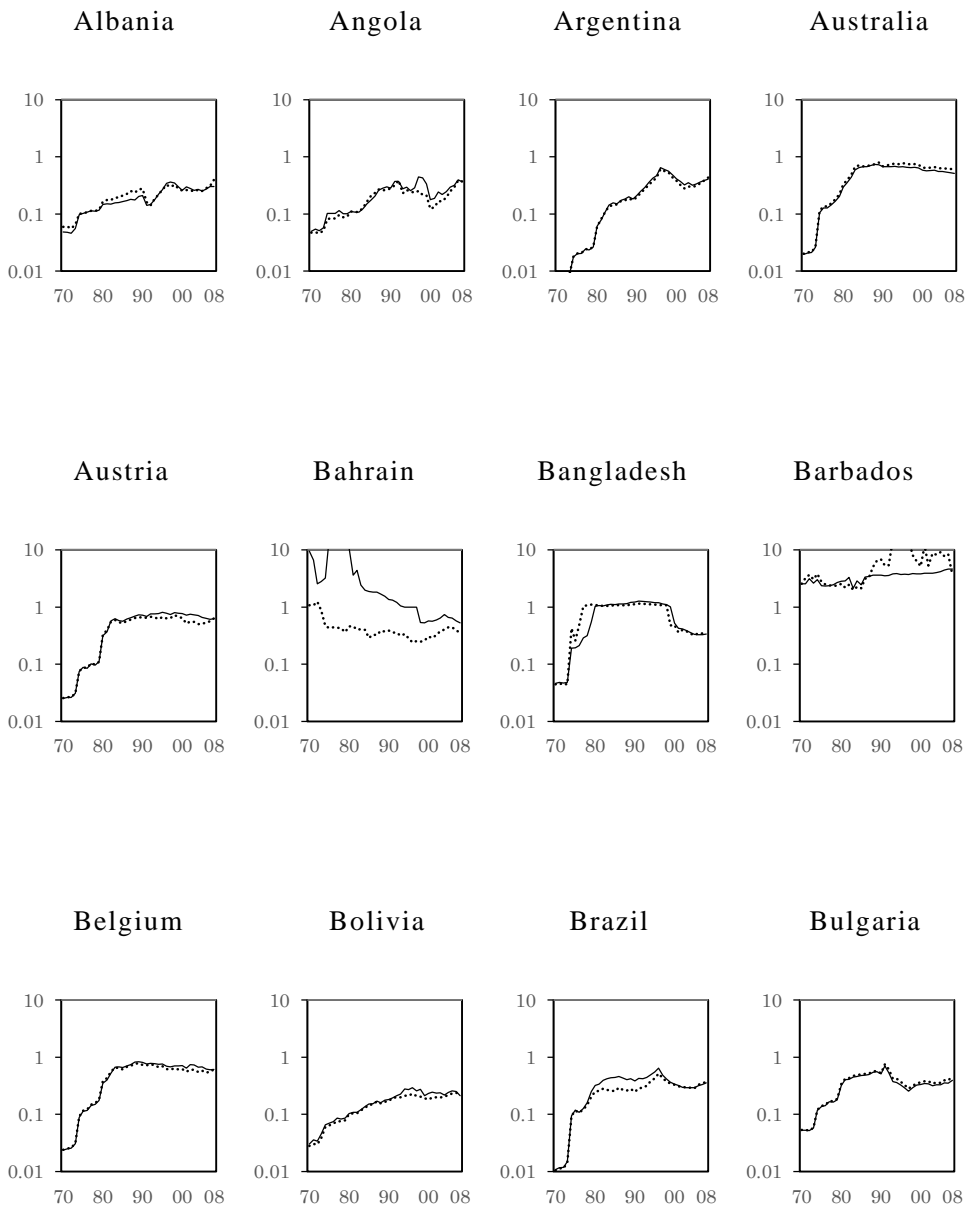

Burkina Faso

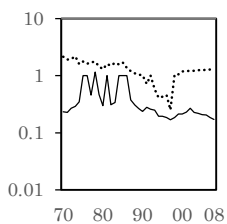

Cambodia

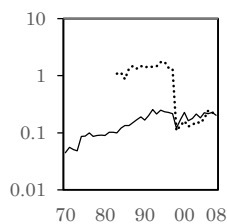

Cameroon

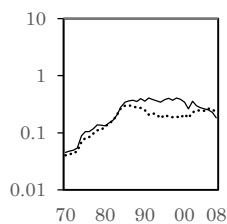

Canada

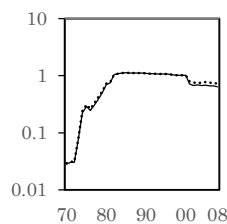

Chile

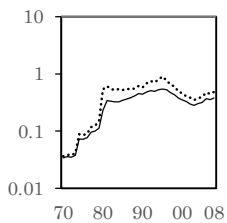

China

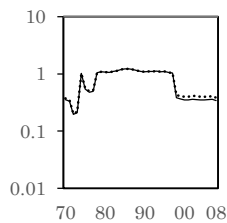

Colombia

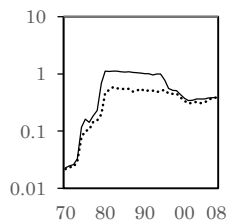

Congo, Dem. Rep.

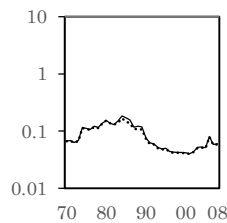

Costa Rica

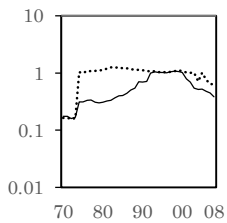

Cote d'Ivoire

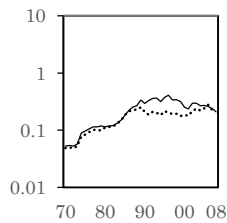

Cyprus

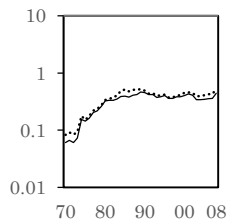

Denmark

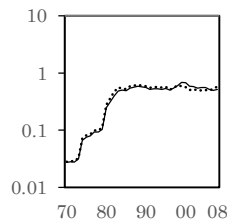

Dominican Republic

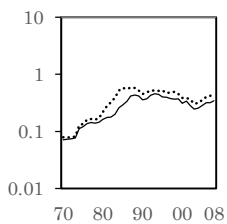

Ecuador

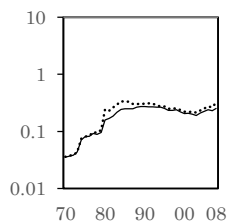

Egypt

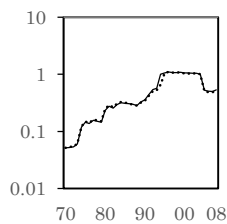

Ethiopia

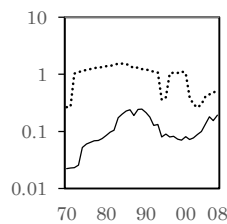

**Finland**

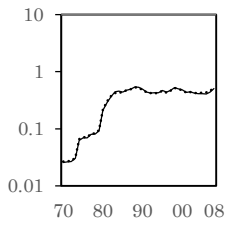

**France**

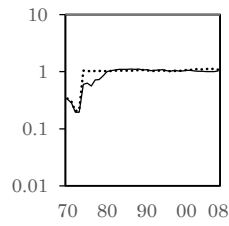

**Germany**

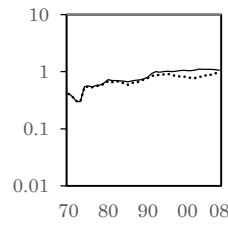

**Ghana**

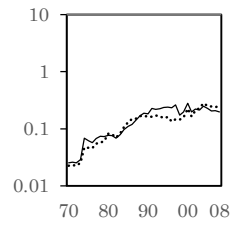

**Greece**

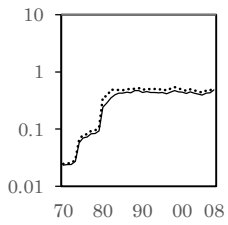

**Guatemala**

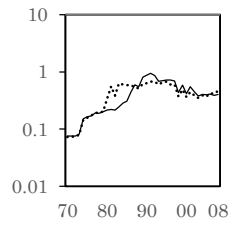

**Honduras**

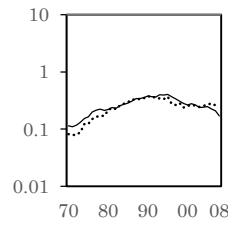

**Hong Kong**

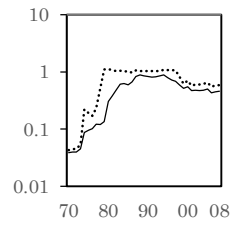

**Hungary**

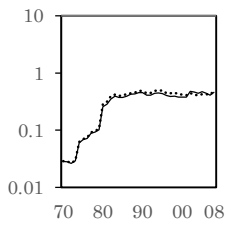

**Iceland**

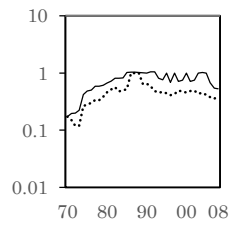

**India**

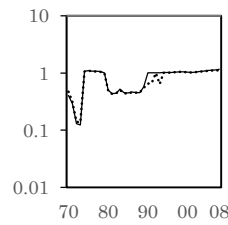

**Indonesia**

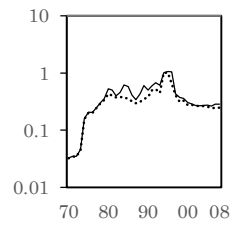

**Iran**

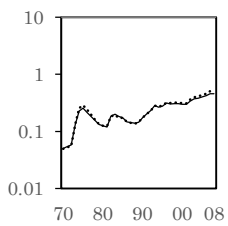

**Iraq**

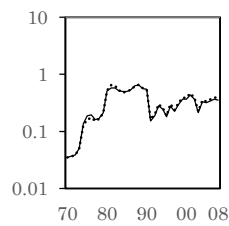

**Ireland**

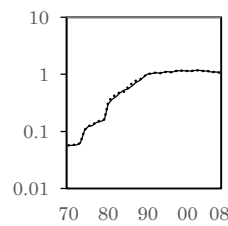

**Israel**

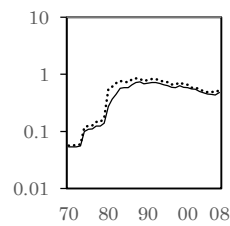

Italy

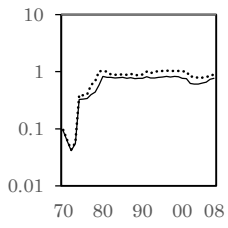

Jamaica

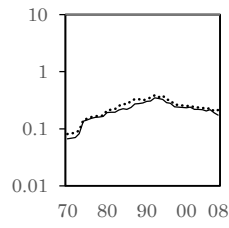

Japan

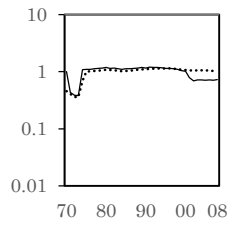

Jordan

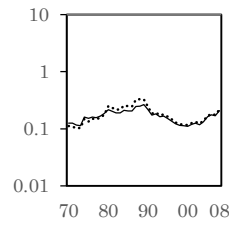

Kenya

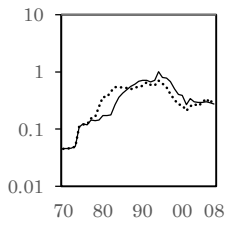

Korea, Republic of

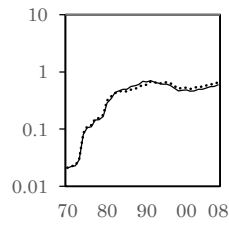

Kuwait

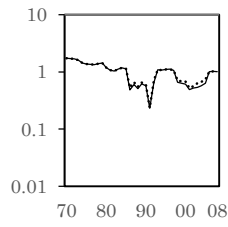

Luxembourg

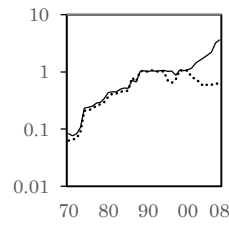

Madagascar

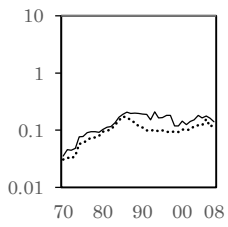

Malawi

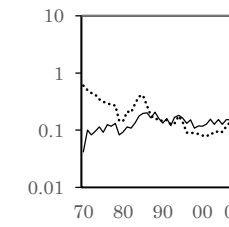

Malaysia

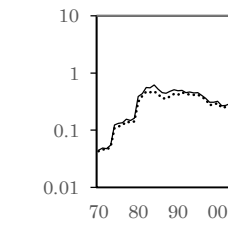

Mali

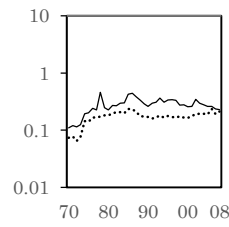

Malta

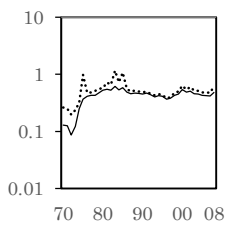

Mexico

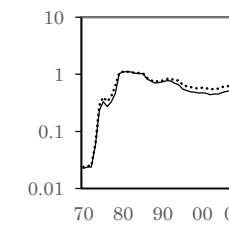

Morocco

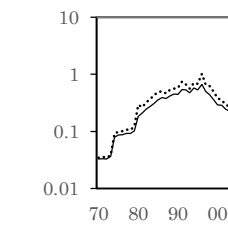

Mozambique

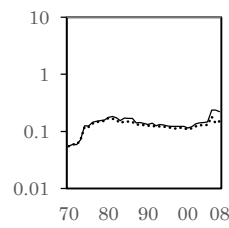

Netherlands

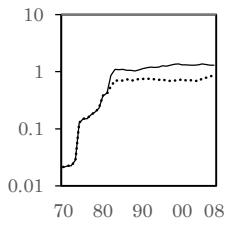

New Zealand

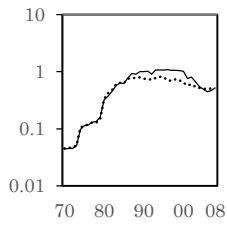

Niger

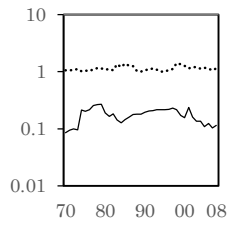

Nigeria

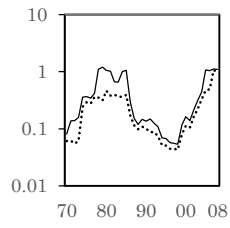

Norway

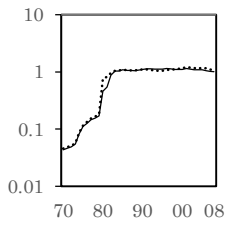

Oman

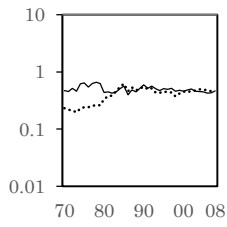

Pakistan

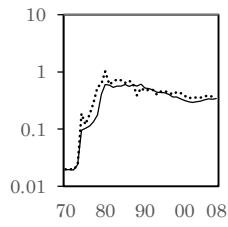

Panama

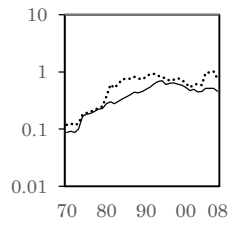

Paraguay

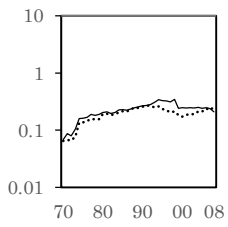

Peru

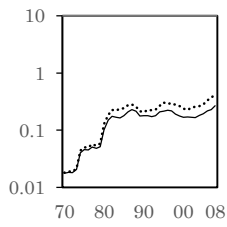

Philippines

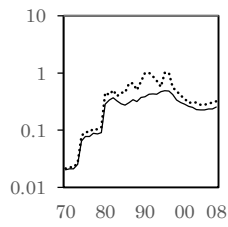

Poland

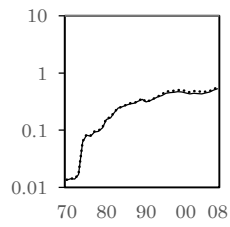

Portugal

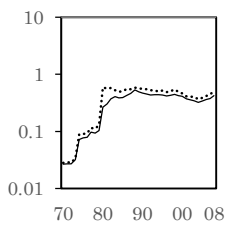

Qatar

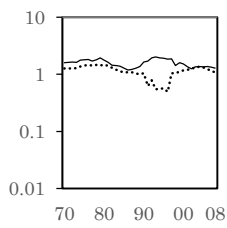

Saudi Arabia

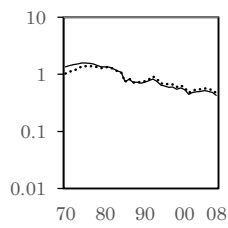

Senegal

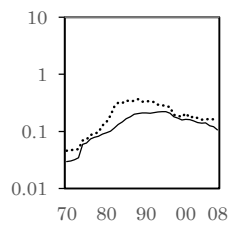

Singapore

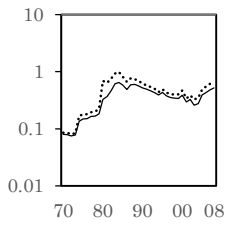

South Africa

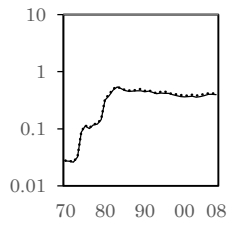

Spain

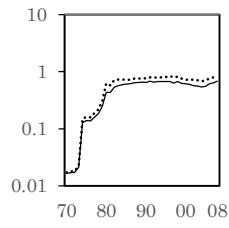

Sri Lanka

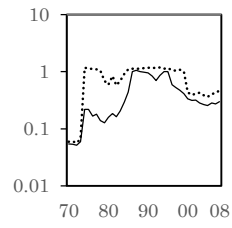

Sudan

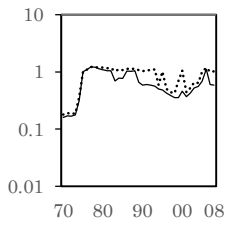

Sweden

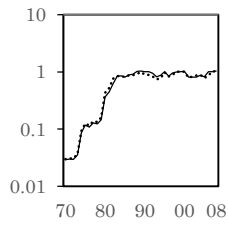

Switzerland

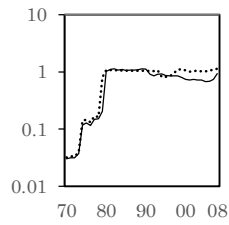

Syria

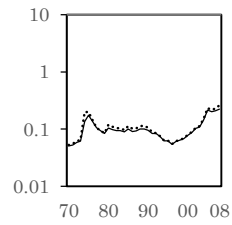

Taiwan

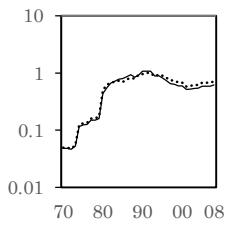

Tanzania

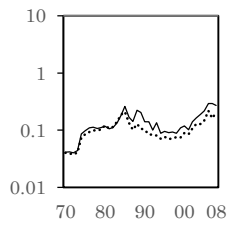

Thailand

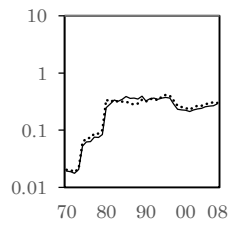

Trinidad & Tobago

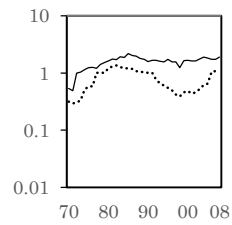

Tunisia

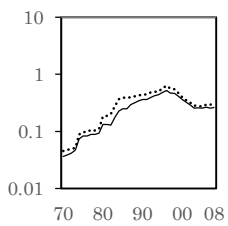

Turkey

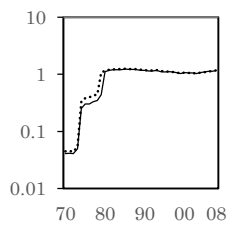

Uganda

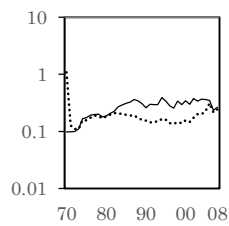

United Kingdom

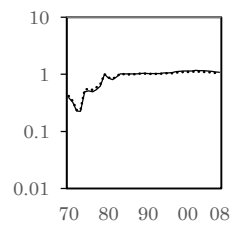

United States

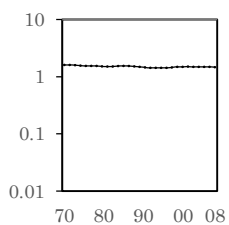

Uruguay

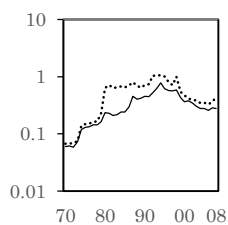

Venezuela

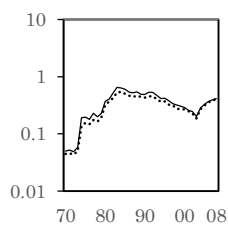

Vietnam

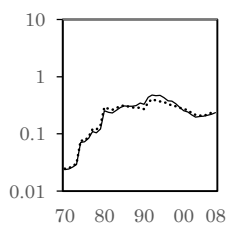

Zambia

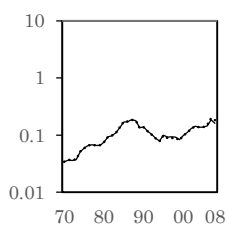

Zimbabwe

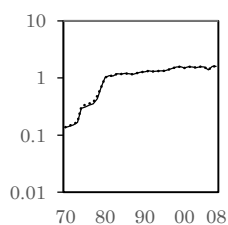

(Note) Solid and dotted lines present environmental efficiency for SO<sub>2</sub> and CO<sub>2</sub>, respectively.

Note that the vertical axis is a logarithmic axis for visualization. CO<sub>2</sub> environmental efficiency

scores of Cambodia for 1970–1982 are not presented because of non-existence of solutions for the

linear programming problem.
